# Supplementary material for: A Mechanistic Study of the Osteogenic Effect of Arecoline in an Osteoporosis Model: Inhibition of Iron Overload-Induced Osteogenesis by Promoting Heme Oxygenase-1 Expression
Source: Antioxidants (Basel). 2024 Mar 31;13(4):430. doi: 10.3390/antiox13040430 (PMC11047558; doi:10.3390/antiox13040430)
Supplement: Supplementary file 1 [file antioxidants-13-00430-s001.zip › ACL FAC Supplemental tables.xlsx]

## Sheet: Table S1. single-guide RNAs 
Table S1. single-guide RNAs for hmox1a gene knock out
GeneID	TranscriptID	Name	Primer	Spacer	Strand	Modification
ENSDARG00000027529	ENSDART00000030890	hmox1a_Target_1	TAATACGACTCACTATAGGGCGGCAGAGAACACTGGCGTTTTAGAGCTAGAAATAGC	AAGCGGCAGAGAACACTGGC	+	gg18NGG
ENSDARG00000027529	ENSDART00000030890	hmox1a_Target_2	TAATACGACTCACTATAGGCACTTCTTCGGCCCCCAGGTTTTAGAGCTAGAAATAGC	AGCACTTCTTCGGCCCCCAG	+	gG18NGG
ENSDARG00000027529	ENSDART00000030890	hmox1a_Target_3	TAATACGACTCACTATAGGACAGATCTCCGAGGTAGCGTTTTAGAGCTAGAAATAGC	AGACAGATCTCCGAGGTAGC	-	gG18NGG
ENSDARG00000027529	ENSDART00000030890	hmox1a_Target_4	TAATACGACTCACTATAGGATTGGCGCTCGTCACTCCGTTTTAGAGCTAGAAATAGC	CTATTGGCGCTCGTCACTCC	-	gg18NGG

## Sheet: Tbale S2. qPCR primers
Tbale S2. qPCR primers
Gene name	Forward sequence	Reverse sequence
MC3T3-E1 cells
β-actin	ACTCTTCCAGCCTTCCTTCC	GTACTTGCGCTCAGGAGGAG
Runx2	AATTAACGCCAGTCGGAGCA	CACTTCTCGGTCTGACGACG
Osteocalcin	CAAAGGTGCAGCCTTTGTGTC	TCACAGTCCGGATTGAGCTCA
Osteopontin	CAGTGATTTGCTTTTGCCTGTTTG	GGTCTCATCAGACTCATCCGAATG
Zebrafish
elfa	CTTCTCAGGCTGACTGTGC	CCGCTAGCATTACCCTCC
spp1	GAGCCTACACAGACCACGCCAACAG	GGTAGCCCAAACTGTCTCCCCG
runx2a	GACGGTGGTGACGGTAATGG	TGCGGTGGGTTCGTGAATA
bglap	TAAACCGGGAAGCACCATCC	AAGAAGACGTGGCGTTAGCA
slc34a2a	AACACAGATTTCCCT TTTCCATTT	CAAGAGGAGTTATAGC CGATGT
loc558816	CTGGACCTGCATAAACTCGC	CTGTCCAGGGTTTGCTTGTC
acsl4a	AGCGGACTGGCAGCACTAGG	GAAGCAGGCTTGAGCGGTGATC
tp53 (p53)	GTTGGTAATGATGCC GTCC TCGATG	CAG AGT CGC TTC TTC CTT CG
casp3a	CCG CTG CCC ATC ACT A	ATA CTT TCA CGA CCA TCT
casp9	CTG AGG CAA GCC ATA ATC G	AGA GGA CAT GGG AAT AGC GT
hmox1a	GAAACGCAGACCACCCAGCAG	CGGCAGGCACTGTTATTCTCTTCC
hmox1a-2	GCTTCTGCTGTGCTCTCTATACG	CAATCTCTCTCAGTCTCTGTGC
Actin	CCGTCTTCCCCTCCA TCGTTGG	GTTGGTAATGATGCC GTCC TCGATG

## Sheet: Table S3. siRNA sequences
Table S3. siRNA sequences for RNAi
Name	Sense	Antisense
HO-1	UGAACACUCUGGAGAUGAC	GUCAUCUCCAGAGUGUCCA
HO-1 -2	GCCACACAGCACUAUGUAA	UUACAUAGUGCUGUGUGGC
nonspecific siRNA	GCGCGCUUUGUAGGAUUCG	CGAAUCCUACAAAGCGCGC
nonsilencing siRNA	UUCUCCGAACGUGUCACGU	ACGUGACACGUUCGGAGAA
